# Supplementary material for: CellMixS: quantifying and visualizing batch effects in single-cell RNA-seq data
Source: Life Sci Alliance. 2021 Mar 23;4(6):e202001004. doi: 10.26508/lsa.202001004 (PMC7994321; doi:10.26508/lsa.202001004)
Supplement: Supplementary file 1 [file LSA-2020-01004_TableS1.xlsx]

## Sheet: Table 1
Table S1. Datasets: Short summaries on datasets included in the benchmark. Genes, cells, batches, cluster refer to the respective number per dataset. Access information to the raw and (pre-)processed data objects.
	Dataset	Cells	Genes	Batches	Cluster	Access raw data	Access processed data
	CellBench	1401	13575	3	3	GEO: GSE118767	https://bioconductor.org/packages/release/bioc/html/CellBench.html
	Human Cell Atlas - Mereu (hca)	20237	23381	13	8	GEO: GSE133549	https://www.dropbox.com/s/i8mwmyymchx8mn8/sce.all_classified.technologies.RData?dl=0
	Pbmc media and patient (pbmc2pat, pbmc2media)	22824	8331	2/3	14	ArrayExpress: E-MTAB-9916	DOI: 10.6084/m9.figshare.13341200.v1
	Cerebral spine fluid (csf_pat, csf_media)	3149	3613	3/2	5	ArrayExpress: E-MTAB-9916	DOI: 10.6084/m9.figshare.13341200.v1
	Pbmc Roche	10096	4756	4	9	ArrayExpress: E-MTAB-9916	DOI: 10.6084/m9.figshare.13341200.v1
	Kang	14619	3757	8	8	GEO: GSE9658	https://bioconductor.org/packages/release/data/experiment/vignettes/muscData/inst/doc/muscData.html
	Pancreas	5683	25381	3	13	GEO: GSE81076, GSE85241, GSE86469, ArrayExpress: E-MTAB-5061	https://satijalab.org/seurat/v3.0/integration.html https://www.dropbox.com/s/1zxbn92y5du9pu0/pancreas_v3_files.tar.gz?dl=1
